# Supplementary material
Source: Elsevier journal article supplement (https://comptes-rendus.academie-sciences.fr/geoscience/article/10.1016/j.crte.2017.08.003/file/attach/mmc2.pdf)
Supplement: mmc2 [file mmc2.pdf]

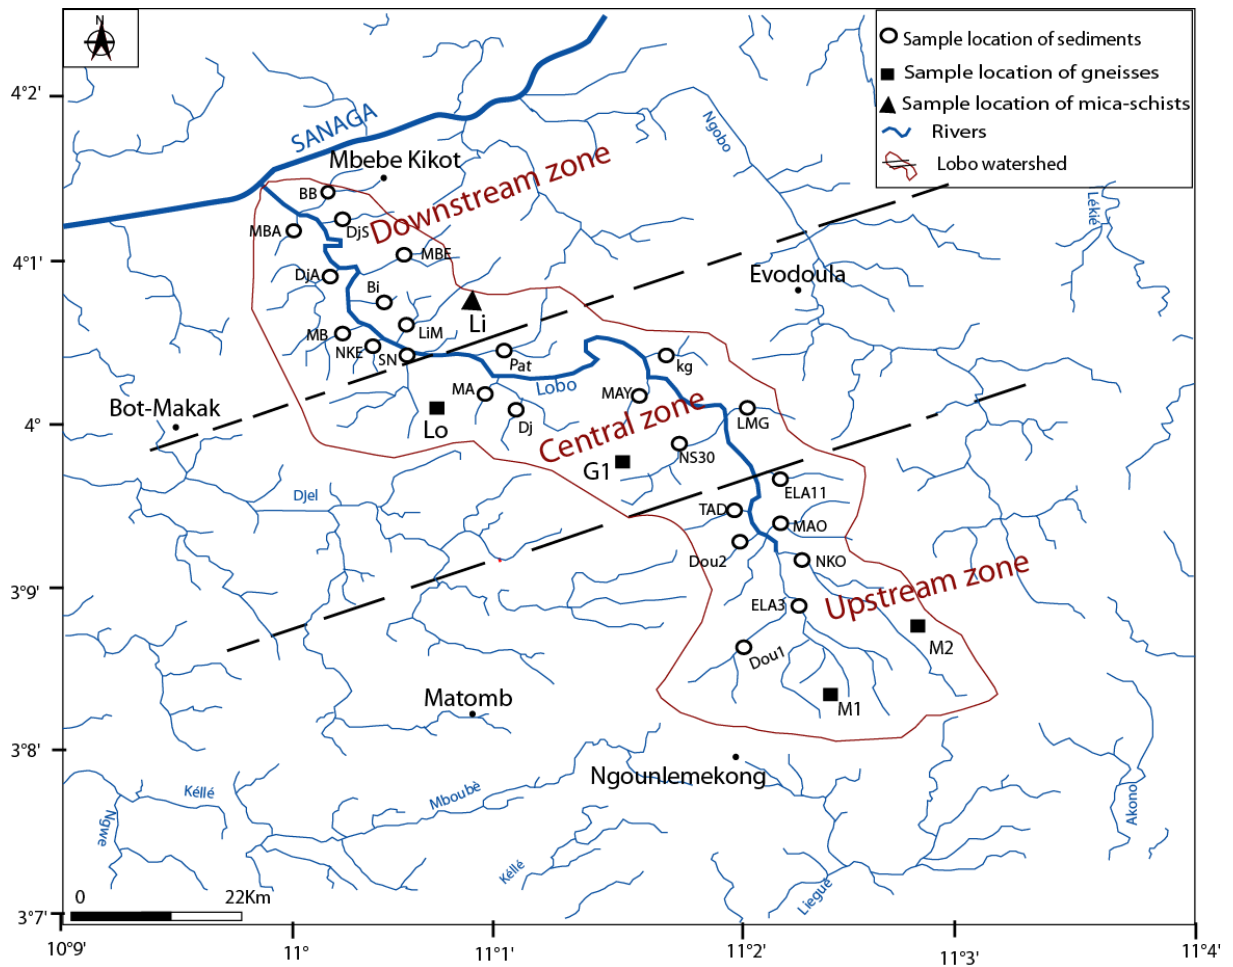

Figure SM1. Sampling map of the Lobo watershed.
